# Supplementary material for: Comparative proteinuria management of different angiotensin-converting enzyme inhibitors or angiotensin receptor blockers for normotensive patients with CKD: a Bayesian network meta-analysis
Source: PeerJ. 2020 Mar 12;8:e8575. doi: 10.7717/peerj.8575 (PMC7073241; doi:10.7717/peerj.8575)
Supplement: Supplemental Information 1 [file peerj-08-8575-s001.xls]

## Sheet: raw data
											CASP Checklist															Age(yrs)				Gender						The numbers of each group				Data of the pre-treatment	Proteinuria (g/24 h)
Study	Numbers of group	Distinctiveness	Group1	Group2			Group3			Nation	Q1	Q2	Q3	Q4	Q5	Q6	Q7	Q8	Q9	Q10	Q11	Protopathy	Blood pressure requirements for enrollment（mmHg）	CKD stage	Nation(Center)	Group1	Group2	Group3	Group4	Group1	Group2	Group3	Group4	Total sample size	Follow-up (months)	Group1	Group2	Group3	Group4		Group1	Mean	SD	Group2	Mean	SD	Group3	Mean	SD
Horita,Y 2004	3	3 groups comparison	temocapril 1mg qd	losartan 12.5mg qd			temocapril 1mg+losartan 12.5mg qd			Japan	Y	Y	Y	Y	Y	Y	Y	Y	Y	Y	High	IgA Nephropathy	NS	>50 ml/min/1.73m2	Japan（1）	39.6± 10.8	42.7± 12.0	39.6± 10.4	/	4/6	6/4	6/5	/	31	6	10	10	11	/		7.09± 0.41	7.09	0.41	6.87± 0.35	6.87	0.35	6.75± 0.62	6.75	0.62
Maschio G, 1994	2	cross-over design	fosinopril 20mg qd	placebo			/			Italy	Y	N	Y	Y(computer-generated randomized code)	NS	Y	Y	Y	Y	Y	High	IgA Nephropathy	NS	103±23 ml/min/1.73 m²	Italy(1)	NS	NS	/	/	NS	NS	/	/	78	8	39	39	/	/		1.37 ±0.98 g	1.37	0.98	1.79 ± 1.20 g	1.79	1.2	/	/	/
Nakamura T, 2007	3	healthy population also included	olmesartan 10mg qd	temocapril 2mg qd			olmesartan 10mg+ temocapril 2mg qd			Japan	Y	Y	Y	N	Y	Y	Y	N	Y	Y	High	IgA Nephropathy	<140/90	NS	Japan（1）	34±7	31±8	31±7	/	5/3	4/4	4/4	/	24	3	8	8	8	/		2.0±0.6	2	0.6	2.0±0.5	2	0.5	1.9±0.5	1.9	0.5
Odabas AR,2001	2	one was lost to follow-up because of infection	losartan 50mg qd	placebo			/			Turkey	Y	NS	Y	NS	Y	Y	Y	N	Y	Y	High	Secondary Amyloidosis	<140/90	NS	Trukey	34.3±5.9	32.2±4.3	/	/	14/8	14/8	/	/	44	24	22	22	/	/		4.38±1.0	4.38	1	4.21±1.06	1.42	1.06	/	/	/
Ravid M,1993	2	/	enalapril 10mg qd	placebo			/			Israel	Y	Y	Y	Y	Y	Y	Y	Y	Y	Y	High	Diabetic Nephropathy	<140/90	NS	Israel（1）	43.5±3	44.8±3.5	/	/	21/28	21/24	/	/	94	60	49	45	/	/		0.143 ± 0.064	0.143	0.064	0.123 ± 0.058	0.123	0.058	/	/	/
Renke M, 2004	3	/	losartan 25mg qd	enalapril 10mg qd			losartan 25mg+enalapril 10mg qd			Poland	Y	Y	Y	N	Y	Y	Y	Y	Y	Y	High	IgA Nephropathy	<140/90	NS	Poland（1）	40.4±11.9	43.4±10.1	37.7±12.7	/	7/11	12/6	11/5	/	52	9	18	18	16	/		2.17±1.52	2.17	1.52	2.6±1.69	2.6	1.69	3.25±1.82	3.25	1.82
Shen PC, 2012	2	/	losartan 50mg qd	placebo			/			China	Y	Y	Y	N	Y	Y	Y	N	Y	Y	High	Nondiabetic Chronic Kidney Disease	<140/90	CKD3	China（1）	50.2±10.4	49.1±11.5	/	/	58/54	56/58	/	/	226	12	112	114	/	/		1.72±0.47	1.72	0.47	1.73±0.49	1.73	0.49	/	/	/
Shimizu A, 2008	2	/	losartan 12.5mg qd	placebo（antiplatelet）			/			Japan	Y	Y	Y	N	Y	Y	Y	Y	Y	Y	High	IgA Nephropathy	<140/90	>50 ml/min/1.73m²	Japan（1）	36.0±8.5	35.7±8.1	/	/	11/7	6/12	/	/	36	12	18	18	/	/		0.81±0.5	0.81	0.5	0.73±0.36	0.73	0.36	/	/	/
Kosmadakis G, 2010	2	did not mention the condition of blood pressure;but the people with hypertension were excluded.	lisinopril 10mg qd	losartan 100mg qd			/			Greece	Y	Y	Y	NS	Y	Y	Y	NS	Y	Y	High	Idiopathic membranous nephropathy	NS	NS	Greece	52.1 ± 15.3	50.5 ± 15.5	/	/	6/7	7/7	/	/	27	12	13	14	/	/		4.82 ± 1.26	4.82	1.26	4.55 ± 1.09	4.55	1.09	/	/	/
Acbay O, 2001	2	Did not mention age and gender of each group. 16 patients with normotensive diabetic nephropathy were included in the study,including 8 males and 8 females.	enalapril 5mg qd	losartan 25mg qd			/			Turkey	Y	Y	Y	Y	Y	Y	Y	N	Y	Y	High	Diabetic Nephropathy	<140/90	NS	Turkey（1）	29.4±5.2	/	/	/	NS	NS	/	/	16	2	8	8	/	/		UAE:162±44.9(65-250) mg/d	0.162	0.045	160±51.02 (60-246)mg/d	0.16	0.051	/	/	/
Usta M, 2003	2	/	losartan 50mg qd	placebo			/			Turkey	Y	Y	Y	Y	Y	Y	Y	Y	Y	Y	High	FSGS	NS	NS	Turkey	32±10	32±13	/	/	8/5	6/4	/	/	23	12	13	10	/	/		3.6±0.5	3.6	0.5	3.4±0.4	3.4	0.4	/	/	/
Agha A, 2009	2	The primary outcome was 24 hour urinary microalbumin.Among the 383 recruited patients, 22 patiens was lost to follow-up.	losartan 50mg qd	placebo(vitamin B-12 mecobalamin 500 mcg/day)			/			Pakistan	Y	Y	Y	Y	Y	Y	Y	N	Y	Y	High	Diabetic Nephropathy (Type II)	<140/90	NS	Pakistan（1）	53.9±11.1	54.7±10.9	/	/	10/9	NS	/	/	361	6	171	190	/	/		101.9±21.7mg/dL	0.1019	0.022	104.7±26.3mg/dL	0.1047	0.0263	/	/	/
Atmaca A, 2006	3	3 groups comparison. UAER(urinary albumin excretion rate) as the primary outcome. Microalbuminuria was defined as UAER of 30 to 300 mg/d	lisinopril 10mg qd	losartan 50mg qd			lisinopril 10mg+losartan 50mg qd			Turkey	Y	Y	Y	Y	Y	Y	Y	N	Y	Y	High	Diabetic Nephropathy (Type II)	NS	NS	NS	55.1±8.9	55.1±9.2	55.1±9.6	/	4/5	4/5	3/5	/	26	12	9	9	8	/		70.2±32.9mg/d	0.07	0.0329	70.1±16.2mg/d	0.07	0.0162	70.1±31.9mg/d	0.07	0.0319
Nakamura T, 2002	3	/	trandolapril 2mg qd	candesartan cilexetil 8mg qd			trandolapril 2mg+candesartan cilexetil 8mg qd			Japan	Y	Y	Y	NS	Y	Y	Y	Y	Y	Y	High	Diabetic Nephropathy	<140/90	NS	NS	57.0±9.5	56.5±10.0	57.8±9.0	54.8±9.3	10/5	9/6	11/4	10/5	60	18	15	15	15	15		60-196μg/min	0.184	0.048	66-184μg/min	0.1786	0.0426	68-188μg/min	0.1843	0.0441
Q1:Did the trial address a clearly focused issue? Q2:Was the assignment of patients to treatments randomised? Q3:Were all of the patients who entered the trial properly accounted for at
its conclusion? Q4:Were patients, health workers and study personnel ‘blind’ to treatment? Q5:Were the groups similar at the start of the trial? Q6:Aside from the experimental intervention,
were the groups treated equally? Q7: How large was the treatment effect? Q8:How precise was the estimate of the treatment effect? Q9:Can the results be applied to the local population,
or in your context? Q10: Were all clinically important outcomes considered? Q11:Are the benefits worth the harms and costs?
[truncated: 100 more columns]
